# Supplementary material for: Recent Advance Analysis of Recovery in Hospitalized People with COVID-19: A Systematic Review
Source: MDPI journal article supplement (doi:10.3390/ijerph192114609), 2022-11-07
Supplement: s1 [file s1]

## SUPPLEMENTARY MATERIAL

**Table S1. Search strategy**

| Search strategy                                                                                                                                                                                                                                                                                                                                                                                                                                                                                                                                                                                                                                                                                                                                                                                                                                                                                                                                                                                                                                                                                                                                                                                                                                                                                                                                                                                                                                                                                                                                                                                                                                                                                                                                                                                                                                                                                                                                                                                                                                                                                                                                                                                                                                                                                                                                                                                                                                                                                                                                                                                                                                                                                                                                                                                                                                                                                                                                                                                                                                                                                                                                                                                                                                                                                                                                           | Date                                                   |
|-----------------------------------------------------------------------------------------------------------------------------------------------------------------------------------------------------------------------------------------------------------------------------------------------------------------------------------------------------------------------------------------------------------------------------------------------------------------------------------------------------------------------------------------------------------------------------------------------------------------------------------------------------------------------------------------------------------------------------------------------------------------------------------------------------------------------------------------------------------------------------------------------------------------------------------------------------------------------------------------------------------------------------------------------------------------------------------------------------------------------------------------------------------------------------------------------------------------------------------------------------------------------------------------------------------------------------------------------------------------------------------------------------------------------------------------------------------------------------------------------------------------------------------------------------------------------------------------------------------------------------------------------------------------------------------------------------------------------------------------------------------------------------------------------------------------------------------------------------------------------------------------------------------------------------------------------------------------------------------------------------------------------------------------------------------------------------------------------------------------------------------------------------------------------------------------------------------------------------------------------------------------------------------------------------------------------------------------------------------------------------------------------------------------------------------------------------------------------------------------------------------------------------------------------------------------------------------------------------------------------------------------------------------------------------------------------------------------------------------------------------------------------------------------------------------------------------------------------------------------------------------------------------------------------------------------------------------------------------------------------------------------------------------------------------------------------------------------------------------------------------------------------------------------------------------------------------------------------------------------------------------------------------------------------------------------------------------------------------------|--------------------------------------------------------|
| <p>OVID (MEDLINE, EMBASE, COCHRANE, AMED)</p> <ol style="list-style-type: none"> <li>1. Longitudinal stud*.mp. [mp=ab, hw, ti, tx, kw, ct, ot, sh, tn, dm, mf, dv, fx, dq, nm, kf, ox, px, rx, ui, sy]</li> <li>2. Prospective Stud*.mp. [mp=ab, hw, ti, tx, kw, ct, ot, sh, tn, dm, mf, dv, fx, dq, nm, kf, ox, px, rx, ui, sy]</li> <li>3. Follow-up stud*.mp. [mp=ab, hw, ti, tx, kw, ct, ot, sh, tn, dm, mf, dv, fx, dq, nm, kf, ox, px, rx, ui, sy]</li> <li>4. Prognosis.mp. [mp=ab, hw, ti, tx, kw, ct, ot, sh, tn, dm, mf, dv, fx, dq, nm, kf, ox, px, rx, ui, sy]</li> <li>5. Survival.mp. [mp=ab, hw, ti, tx, kw, ct, ot, sh, tn, dm, mf, dv, fx, dq, nm, kf, ox, px, rx, ui, sy]</li> <li>6. Survival analysis.mp. [mp=ab, hw, ti, tx, kw, ct, ot, sh, tn, dm, mf, dv, fx, dq, nm, kf, ox, px, rx, ui, sy]</li> <li>7. Logistic model*.mp. [mp=ab, hw, ti, tx, kw, ct, ot, sh, tn, dm, mf, dv, fx, dq, nm, kf, ox, px, rx, ui, sy]</li> <li>8. Proportional hazards model*.mp. [mp=ab, hw, ti, tx, kw, ct, ot, sh, tn, dm, mf, dv, fx, dq, nm, kf, ox, px, rx, ui, sy]</li> <li>9. Disease Progression.mp. [mp=ab, hw, ti, tx, kw, ct, ot, sh, tn, dm, mf, dv, fx, dq, nm, kf, ox, px, rx, ui, sy]</li> <li>10. Life Table*.mp. [mp=ab, hw, ti, tx, kw, ct, ot, sh, tn, dm, mf, dv, fx, dq, nm, kf, ox, px, rx, ui, sy]</li> <li>11. cohort stud*.mp. [mp=ab, hw, ti, tx, kw, ct, ot, sh, tn, dm, mf, dv, fx, dq, nm, kf, ox, px, rx, ui, sy]</li> <li>12. prognos*.mp. [mp=ab, hw, ti, tx, kw, ct, ot, sh, tn, dm, mf, dv, fx, dq, nm, kf, ox, px, rx, ui, sy]</li> <li>13. course.mp. [mp=ab, hw, ti, tx, kw, ct, ot, sh, tn, dm, mf, dv, fx, dq, nm, kf, ox, px, rx, ui, sy]</li> <li>14. inception.mp. [mp=ab, hw, ti, tx, kw, ct, ot, sh, tn, dm, mf, dv, fx, dq, nm, kf, ox, px, rx, ui, sy]</li> <li>15. 1 or 2 or 3 or 4 or 5 or 6 or 7 or 8 or 9 or 10 or 11 or 12 or 13 or 14</li> <li>16. COVID-19.mp. [mp=ab, hw, kw, ti, ot, tx, ct, sh, tn, dm, mf, dv, fx, dq, nm, kf, ox, px, rx, an, ui, sy]</li> <li>17. Coronavirus disease.mp. [mp=ab, hw, kw, ti, ot, tx, ct, sh, tn, dm, mf, dv, fx, dq, nm, kf, ox, px, rx, an, ui, sy]</li> <li>18. nCov.mp. [mp=ab, hw, kw, ti, ot, tx, ct, sh, tn, dm, mf, dv, fx, dq, nm, kf, ox, px, rx, an, ui, sy]</li> <li>19. 19nCov.mp. [mp=ab, hw, kw, ti, ot, tx, ct, sh, tn, dm, mf, dv, fx, dq, nm, kf, ox, px, rx, an, ui, sy]</li> <li>20. novel coronavirus.mp. [mp=ab, hw, kw, ti, ot, tx, ct, sh, tn, dm, mf, dv, fx, dq, nm, kf, ox, px, rx, an, ui, sy]</li> <li>21. novel coronavirus 2019.mp. [mp=ab, hw, kw, ti, ot, tx, ct, sh, tn, dm, mf, dv, fx, dq, nm, kf, ox, px, rx, an, ui, sy]</li> <li>22. Whuan coronavirus.mp. [mp=ab, hw, kw, ti, ot, tx, ct, sh, tn, dm, mf, dv, fx, dq, nm, kf, ox, px, rx, an, ui, sy]</li> <li>23. Whuan pneumonia.mp. [mp=ab, hw, kw, ti, ot, tx, ct, sh, tn, dm, mf, dv, fx, dq, nm, kf, ox, px, rx, an, ui, sy]</li> <li>24. Sars-CoV-2.mp. [mp=ab, hw, kw, ti, ot, tx, ct, sh, tn, dm, mf, dv, fx, dq, nm, kf, ox, px, rx, an, ui, sy]</li> <li>25. Severe acute respiratory syndrome.mp. [mp=ab, hw, kw, ti, ot, tx, ct, sh, tn, dm, mf, dv, fx, dq, nm, kf, ox, px, rx, an, ui, sy]</li> <li>26. 16 or 17 or 18 or 19 or 20 or 21 or 22 or 23 or 24 or 25</li> <li>27. 15 and 26</li> <li>28. limit 27 to yr="2019 -Current"</li> </ol> | <p>Conducted up to<br/>June 28<sup>th</sup>, 2021.</p> |

Table S2. List of studies excluded at full-text screening stage with brief reasons

| Autor             | Year | Journal paper?      | Full text available? | 1. Prospective cohort? | Reason 1                             | 2. Population? | Reason 2                  | 3. Outcome? | Reason 3 | Comments |
|-------------------|------|---------------------|----------------------|------------------------|--------------------------------------|----------------|---------------------------|-------------|----------|----------|
| Abbas             | 2020 |                     |                      | N                      | Cross-sectional/ Retrospective study |                |                           |             |          |          |
| Abdulaal          | 2020 |                     |                      | N                      | Retrospective study                  |                |                           |             |          |          |
| Abohamr           | 2020 |                     |                      | N                      | Descriptive case series              |                |                           |             |          |          |
| Abolghasemi       | 2020 | Letter              |                      |                        |                                      | N              | No inception cohort       |             |          |          |
| Abraham           | 2020 |                     |                      |                        |                                      |                |                           |             |          |          |
| Abrishami         | 2020 |                     |                      |                        |                                      | N              | No inception cohort       |             |          |          |
| Aguila-Gordo      | 2021 |                     |                      | N                      | Retrospective study                  |                |                           |             |          |          |
| Ali               | 2020 |                     |                      | N                      | Retrospective study                  |                |                           |             |          |          |
| Alisadehsani      | 2020 |                     |                      |                        |                                      | N              | Included diagnosis for CT |             |          |          |
| Allameh           | 2020 |                     |                      | N                      | Retrospective study                  |                |                           |             |          |          |
| Allwood           | 2020 | Protocol            |                      |                        |                                      |                |                           |             |          |          |
| Al-Salameh        | 2020 |                     |                      | N                      | Retrospective study                  |                |                           |             |          |          |
| Al-Salameh        | 2021 |                     |                      | N                      | Retrospective study                  |                |                           |             |          |          |
| Alser             | 2021 | Conference Abstract |                      |                        |                                      |                |                           |             |          |          |
| Al-Sulaiman       | 2021 |                     |                      |                        |                                      | N              | No inception cohort       |             |          |          |
| Alvarez-Maldonado | 2021 |                     |                      |                        |                                      | N              | No inception cohort       |             |          |          |
| Andres-Esteban    | 2021 |                     |                      |                        |                                      | N              | No inception cohort       |             |          |          |
| Apea              | 2021 |                     |                      |                        |                                      | N              | Included people <18 y     |             |          |          |
| Arentz            | 2020 | Letter              |                      |                        |                                      |                |                           |             |          |          |
| Aries             | 2021 |                     | N                    |                        |                                      |                |                           |             |          |          |
| Arnold            | 2020 |                     |                      |                        |                                      | N              | No inception cohort       |             |          |          |
| Asch              | 2020 |                     |                      |                        |                                      | N              | No inception cohort       |             |          |          |
| Auld              | 2020 |                     |                      | N                      | Retrospective study                  |                |                           |             |          |          |
| Aw                | 2020 |                     |                      |                        |                                      | N              | Included diagnosis for CT |             |          |          |
| Aydin             | 2020 |                     |                      |                        |                                      | N              | Included diagnosis for CT |             |          |          |

|                         |      |                     |  |   |                     |   |                                                 |  |  |  |
|-------------------------|------|---------------------|--|---|---------------------|---|-------------------------------------------------|--|--|--|
| <b>Bahier</b>           | 2020 |                     |  |   |                     | N | Included no hospitalized patients               |  |  |  |
| <b>Baiardo Redaelli</b> | 2021 |                     |  |   |                     | N | No inception cohort                             |  |  |  |
| <b>Baktash</b>          | 2020 |                     |  |   |                     | N | Included diagnosis for x-ray                    |  |  |  |
| <b>Baqi</b>             | 2021 |                     |  | N | Retrospective study |   |                                                 |  |  |  |
| <b>Baumer</b>           | 2020 |                     |  |   |                     | N | Included suspected or confirmed COVID-19        |  |  |  |
| <b>Bayrak</b>           | 2021 |                     |  |   |                     | N | No inception cohort                             |  |  |  |
| <b>Becchetti</b>        | 2020 |                     |  |   |                     | N | No inception cohort                             |  |  |  |
| <b>Bels</b>             | 2020 |                     |  |   |                     | N | Included diagnosis for CT                       |  |  |  |
| <b>Berenguer</b>        | 2021 |                     |  | N | Retrospective study |   |                                                 |  |  |  |
| <b>Beunier</b>          | 2020 |                     |  |   |                     | N | Included diagnosis for CT and clinical symptoms |  |  |  |
| <b>Bezerra</b>          | 2021 |                     |  | N | Retrospective study |   |                                                 |  |  |  |
| <b>Bezzio</b>           | 2020 |                     |  |   |                     | N | Included diagnosis for CT and clinical symptoms |  |  |  |
| <b>Bloom</b>            | 2020 |                     |  |   |                     | N | No inception cohort                             |  |  |  |
| <b>Booth</b>            | 2020 |                     |  |   |                     |   | Included clinical and radiological diagnosis    |  |  |  |
| <b>Bousquet</b>         | 2020 |                     |  |   |                     | N | Included radiological diagnosis                 |  |  |  |
| <b>Bradley</b>          | 2020 |                     |  |   |                     | N | No inception cohort                             |  |  |  |
| <b>Brar</b>             | 2020 |                     |  | N | Retrospective study |   |                                                 |  |  |  |
| <b>Brenner</b>          | 2020 |                     |  |   |                     | N | Included people <18 y                           |  |  |  |
| <b>Brieghel</b>         | 2021 |                     |  | N | Retrospective study |   |                                                 |  |  |  |
| <b>Budhi</b>            | 2020 | Conference Abstract |  |   |                     |   |                                                 |  |  |  |
| <b>Burrel</b>           | 2020 |                     |  |   |                     | N | Included people <18 y                           |  |  |  |
| <b>Cagnazzo</b>         | 2020 |                     |  |   |                     | N | No inception cohort                             |  |  |  |
| <b>Calik Basaran</b>    | 2021 |                     |  |   |                     | N | Included non confirmed COVID-19                 |  |  |  |
| <b>Calvo-Fernandez</b>  | 2020 |                     |  |   |                     | N | No inception cohort                             |  |  |  |
| <b>Cariou</b>           | 2020 |                     |  |   |                     | N | Included clinical/radiological diagnosis        |  |  |  |

|                          |      |                     |  |   |                     |   |                                                 |  |  |  |
|--------------------------|------|---------------------|--|---|---------------------|---|-------------------------------------------------|--|--|--|
| <b>Carter</b>            | 2020 |                     |  |   |                     | N | Included clinical/radiological diagnosis        |  |  |  |
| <b>Chaibi</b>            | 2020 |                     |  | N | Retrospective study |   |                                                 |  |  |  |
| <b>Chen</b>              | 2020 |                     |  | N | Retrospective study |   |                                                 |  |  |  |
| <b>Chew</b>              | 2021 |                     |  | N | Retrospective study |   |                                                 |  |  |  |
| <b>Ciceri</b>            | 2020 |                     |  |   |                     | N | Included radiological diagnosis                 |  |  |  |
| <b>Coca</b>              | 2020 |                     |  |   |                     | N | No inception cohort                             |  |  |  |
| <b>Conway</b>            | 2020 |                     |  |   |                     | N | No inception cohort                             |  |  |  |
| <b>Covino</b>            | 2021 |                     |  |   |                     | N | No inception cohort                             |  |  |  |
| <b>Crespo</b>            | 2020 |                     |  |   |                     | N | Included no hospitalized people                 |  |  |  |
| <b>Daifi</b>             | 2020 |                     |  | N | Retrospective study |   |                                                 |  |  |  |
| <b>Dang</b>              | 2020 | Conference Abstract |  |   |                     |   |                                                 |  |  |  |
| <b>De Roubin</b>         | 2021 |                     |  | N | Retrospective study |   |                                                 |  |  |  |
| <b>De Souza</b>          | 2021 |                     |  |   |                     | N | Included people <18 y                           |  |  |  |
| <b>de-Azambuja</b>       | 2020 |                     |  |   |                     | N | Included diagnosis for CT and clinical symptoms |  |  |  |
| <b>Dobre</b>             | 2021 |                     |  |   |                     | N | No inception cohort                             |  |  |  |
| <b>Doyen</b>             | 2020 |                     |  |   |                     | N | No inception cohort                             |  |  |  |
| <b>Drake</b>             | 2020 |                     |  | N | Retrospective study |   |                                                 |  |  |  |
| <b>Du</b>                | 2020 |                     |  |   |                     | N | Included clinical diagnosis                     |  |  |  |
| <b>Dushimova</b>         | 2020 | Conference Abstract |  |   |                     |   |                                                 |  |  |  |
| <b>Elhadi</b>            | 2021 |                     |  |   |                     | N | No inception cohort                             |  |  |  |
| <b>Elkrief</b>           | 2020 |                     |  |   |                     | N | No inception cohort                             |  |  |  |
| <b>El-Solh</b>           | 2021 |                     |  | N | Retrospective study |   |                                                 |  |  |  |
| <b>Fadulelmola</b>       | 2020 |                     |  | N | Retrospective study |   |                                                 |  |  |  |
| <b>Farre</b>             | 2020 |                     |  |   |                     | N | No inception cohort                             |  |  |  |
| <b>Favalli</b>           | 2020 |                     |  |   |                     | N | No inception cohort                             |  |  |  |
| <b>Fenioux</b>           | 2021 |                     |  |   |                     | N | No inception cohort                             |  |  |  |
| <b>Fernandez-Capitan</b> | 2020 |                     |  |   |                     | N | No inception cohort                             |  |  |  |

|                          |      |  |  |   |                     |   |                                                 |  |  |                |
|--------------------------|------|--|--|---|---------------------|---|-------------------------------------------------|--|--|----------------|
| <b>Fernandez-Capitan</b> | 2021 |  |  |   |                     | N | No inception cohort                             |  |  |                |
| <b>Ferrando-Vivas</b>    | 2021 |  |  |   |                     | N | No inception cohort                             |  |  |                |
| <b>Figueroa-Pena</b>     | 2020 |  |  |   |                     | N | No inception cohort                             |  |  |                |
| <b>Flaatten</b>          | 2021 |  |  |   |                     | N | No inception cohort                             |  |  |                |
| <b>Fominskiy</b>         | 2021 |  |  |   |                     | N | Included diagnosis for CT and clinical symptoms |  |  |                |
| <b>Forest</b>            | 2020 |  |  | N | Retrospective study |   |                                                 |  |  |                |
| <b>Frager</b>            | 2020 |  |  |   |                     | N | No inception cohort                             |  |  |                |
| <b>Fried</b>             | 2020 |  |  |   |                     | N | No inception cohort                             |  |  |                |
| <b>Fried</b>             | 2021 |  |  |   |                     | N | No inception cohort                             |  |  |                |
| <b>Frontera</b>          | 2020 |  |  |   |                     | N | No inception cohort                             |  |  |                |
| <b>Fuentes Antras</b>    | 2020 |  |  |   |                     | N | No inception cohort                             |  |  |                |
| <b>Gadotti</b>           | 2020 |  |  |   |                     | N | Included inception > 10 days of onset symptoms  |  |  |                |
| <b>Garcia-Vidal</b>      | 2021 |  |  |   |                     | N | No inception cohort                             |  |  |                |
| <b>Gavrilina</b>         | 2020 |  |  |   |                     | N | No inception cohort                             |  |  |                |
| <b>Georges</b>           | 2020 |  |  | N | Clinical trial      |   |                                                 |  |  |                |
| <b>Geretti</b>           | 2020 |  |  |   |                     | N | No inception cohort                             |  |  |                |
| <b>Gessler</b>           | 2021 |  |  |   |                     | N | No inception cohort                             |  |  |                |
| <b>Ghio</b>              | 2020 |  |  | N | Retrospective study |   |                                                 |  |  |                |
| <b>Giacomelli</b>        | 2021 |  |  |   |                     |   |                                                 |  |  | Duplicate data |
| <b>Gil-Rodrigo</b>       | 2020 |  |  |   |                     | N | Included clinical diagnosis                     |  |  |                |
| <b>Glasbey</b>           | 2020 |  |  |   |                     | N | No inception cohort                             |  |  |                |
| <b>Glenthoj</b>          | 2020 |  |  |   |                     | N | Included no hospitalized people                 |  |  |                |
| <b>Haase</b>             | 2020 |  |  | N | Retrospective study |   |                                                 |  |  |                |
| <b>Haberman</b>          | 2020 |  |  |   |                     | N | Included non confirmed COVID-19                 |  |  |                |
| <b>Hagg</b>              | 2020 |  |  |   |                     | N | Included non confirmed COVID-19                 |  |  |                |
| <b>Hayek</b>             | 2020 |  |  |   |                     | N | No inception cohort                             |  |  |                |
| <b>Heberto</b>           | 2020 |  |  |   |                     | N | No inception cohort                             |  |  |                |
| <b>Hernandez-Rubio</b>   | 2020 |  |  |   |                     | N | No inception cohort                             |  |  |                |
| <b>Hewitt</b>            | 2020 |  |  |   |                     | N | Included clinical diagnosis                     |  |  |                |
| <b>Hicini</b>            | 2020 |  |  |   |                     | N | Included asymptomatics people                   |  |  |                |

|                        |      |        |  |   |                     |   |                                      |  |  |  |
|------------------------|------|--------|--|---|---------------------|---|--------------------------------------|--|--|--|
| <b>Hirsch</b>          | 2020 |        |  | N | Retrospective study |   |                                      |  |  |  |
| <b>Hittersdorf</b>     | 2020 |        |  | N | Retrospective study |   |                                      |  |  |  |
| <b>Hollein</b>         | 2020 | Letter |  |   |                     |   |                                      |  |  |  |
| <b>Iftimie</b>         | 2020 |        |  |   |                     | N | No inception cohort                  |  |  |  |
| <b>Inciardi</b>        | 2020 |        |  |   |                     | N | No inception cohort                  |  |  |  |
| <b>Jaspard</b>         | 2021 |        |  |   |                     | N | Included people <18 y                |  |  |  |
| <b>Karbalai</b>        | 2020 |        |  | N | Retrospective study |   |                                      |  |  |  |
| <b>Kasivisvanathan</b> | 2020 |        |  |   |                     | N | Patients no hospitalized by COVID-19 |  |  |  |
| <b>Kates</b>           | 2020 |        |  |   |                     | N | No inception cohort                  |  |  |  |
| <b>Ken-Dror</b>        | 2020 |        |  |   |                     | N | No inception cohort                  |  |  |  |
| <b>Khalil</b>          | 2020 |        |  |   |                     | N | No inception cohort                  |  |  |  |
| <b>Khalili</b>         | 2020 |        |  |   |                     | N | No inception cohort                  |  |  |  |
| <b>Khan</b>            | 2020 |        |  | N | Retrospective study |   |                                      |  |  |  |
| <b>Khan</b>            | 2020 |        |  |   |                     | N | No inception cohort                  |  |  |  |
| <b>Khan</b>            | 2020 |        |  |   |                     | N | No inception cohort                  |  |  |  |
| <b>Kirenga</b>         | 2020 |        |  |   |                     | N | Included people <18 y                |  |  |  |
| <b>Kjeldsen</b>        | 2021 |        |  |   |                     | N | No inception cohort                  |  |  |  |
| <b>Knopp</b>           | 2020 |        |  |   |                     | N | No inception cohort                  |  |  |  |
| <b>Knox</b>            | 2021 |        |  |   |                     | N | No inception cohort                  |  |  |  |
| <b>Kocay</b>           | 2020 |        |  |   |                     | N | No inception cohort                  |  |  |  |
| <b>Kocayigit</b>       | 2021 |        |  |   |                     | N | No inception cohort                  |  |  |  |
| <b>Kotflors</b>        | 2020 |        |  | N | Retrospective study |   |                                      |  |  |  |
| <b>Kragholm</b>        | 2020 |        |  |   |                     | N | No hospitalized people               |  |  |  |
| <b>Kristinsson</b>     | 2020 |        |  |   |                     | N | No inception cohort                  |  |  |  |
| <b>Kundi</b>           | 2020 |        |  |   |                     | N | No inception cohort                  |  |  |  |
| <b>Kurtz</b>           | 2021 |        |  |   |                     | N | No inception cohort                  |  |  |  |
| <b>Laake</b>           | 2021 |        |  |   |                     | N | No inception cohort                  |  |  |  |
| <b>Lambermont</b>      | 2021 |        |  |   |                     | N | No inception cohort                  |  |  |  |
| <b>Laosa</b>           | 2020 |        |  |   |                     | N | No inception cohort                  |  |  |  |
| <b>Lassen</b>          | 2020 |        |  |   |                     | N | No inception cohort                  |  |  |  |
| <b>Lee</b>             | 2020 |        |  | N | Retrospective study |   |                                      |  |  |  |
| <b>Li</b>              | 2020 |        |  | N | Retrospective study |   |                                      |  |  |  |
| <b>Li</b>              | 2020 |        |  | N | Retrospective study |   |                                      |  |  |  |
| <b>Li</b>              | 2021 |        |  |   |                     | N | No inception cohort                  |  |  |  |

|                       |      |                     |   |   |                     |   |                                      |  |  |  |
|-----------------------|------|---------------------|---|---|---------------------|---|--------------------------------------|--|--|--|
| <b>Liu</b>            | 2020 |                     |   |   |                     | N | No hospitalized people               |  |  |  |
| <b>Liu</b>            | 2020 |                     |   |   |                     | N | No inception cohort                  |  |  |  |
| <b>Long</b>           | 2020 |                     |   |   |                     | N | No inception cohort                  |  |  |  |
| <b>Lopez-Otero</b>    | 2020 |                     |   |   |                     | N | No inception cohort                  |  |  |  |
| <b>Lowe</b>           | 2021 |                     |   | N | Retrospective study |   |                                      |  |  |  |
| <b>Ma</b>             | 2020 |                     |   |   |                     | N | No inception cohort                  |  |  |  |
| <b>Mandel</b>         | 2020 |                     |   |   |                     | N | No inception cohort                  |  |  |  |
| <b>Manocha</b>        | 2020 |                     |   | N | Retrospective study |   |                                      |  |  |  |
| <b>Marcolino</b>      | 2021 |                     |   | N | Retrospective study |   |                                      |  |  |  |
| <b>Marengoni</b>      | 2020 |                     |   | N | Retrospective study |   |                                      |  |  |  |
| <b>Martin-Sanchez</b> | 2020 |                     |   | N | Retrospective study |   |                                      |  |  |  |
| <b>Mato</b>           | 2020 |                     |   |   |                     | N | No inception cohort                  |  |  |  |
| <b>Mattar</b>         | 2020 |                     |   |   |                     | N | Patients no hospitalized by COVID-19 |  |  |  |
| <b>Mehta</b>          | 2020 |                     |   |   |                     | N | Included asymptomatics people        |  |  |  |
| <b>Mendizabal</b>     | 2020 |                     |   |   |                     | N | Included asymptomatics people        |  |  |  |
| <b>Mendizabal</b>     | 2020 | Conference Abstract |   |   |                     |   |                                      |  |  |  |
| <b>Messika</b>        | 2020 |                     |   | N | Retrospective study |   |                                      |  |  |  |
| <b>Miles</b>          | 2020 |                     |   |   |                     | N | Included non confirmed COVID-19      |  |  |  |
| <b>Mithal</b>         | 2020 |                     |   |   |                     | N | No inception cohort                  |  |  |  |
| <b>Mody</b>           | 2021 |                     |   |   |                     | N | No inception cohort                  |  |  |  |
| <b>Munoz</b>          | 2020 |                     |   | N | Retrospective study |   |                                      |  |  |  |
| <b>Nabors</b>         | 2021 |                     | N |   |                     |   |                                      |  |  |  |
| <b>Nadeen</b>         | 2020 | Letter              |   |   |                     |   |                                      |  |  |  |
| <b>Nemer</b>          | 2020 |                     |   |   |                     | N | No inception cohort                  |  |  |  |
| <b>Nemer</b>          | 2021 |                     |   | N | Retrospective study | N | No inception cohort                  |  |  |  |
| <b>Nunez-Gil</b>      | 2020 |                     |   |   |                     | N | No inception cohort                  |  |  |  |
| <b>Ozer</b>           | 2021 |                     |   | N | Retrospective study |   |                                      |  |  |  |
| <b>Patel</b>          | 2021 |                     |   |   |                     | N | No inception cohort                  |  |  |  |
| <b>Peng</b>           | 2021 |                     |   | N | Retrospective study |   |                                      |  |  |  |
| <b>Perez-Segura</b>   | 2021 |                     |   | N | Retrospective study |   |                                      |  |  |  |

|                       |      |                     |   |   |                       |   |                                                 |  |  |  |
|-----------------------|------|---------------------|---|---|-----------------------|---|-------------------------------------------------|--|--|--|
| <b>Peterlana</b>      | 2020 | Conference abstract |   |   |                       |   |                                                 |  |  |  |
| <b>Petrilli</b>       | 2020 |                     |   |   |                       | N | No inception cohort                             |  |  |  |
| <b>Petrulewicz</b>    | 2020 |                     |   |   |                       | N | No inception cohort                             |  |  |  |
| <b>Pinto</b>          | 2020 |                     |   |   |                       | N | No inception cohort                             |  |  |  |
| <b>Plotnikow</b>      | 2020 |                     |   |   |                       | N | No inception cohort                             |  |  |  |
| <b>Potalivo</b>       | 2020 |                     |   |   |                       | N | No inception cohort                             |  |  |  |
| <b>Price</b>          | 2020 | Protocol            |   |   |                       |   |                                                 |  |  |  |
| <b>Raad</b>           | 2020 | Conference abstract |   |   |                       |   |                                                 |  |  |  |
| <b>Rahim</b>          | 2020 |                     |   | N | Cross-sectional study |   |                                                 |  |  |  |
| <b>Richards-Belle</b> | 2020 |                     |   |   |                       | N | No inception cohort                             |  |  |  |
| <b>Robinson</b>       | 2020 |                     |   |   |                       | N | No inception cohort                             |  |  |  |
| <b>Rodriguez-Lago</b> | 2020 |                     |   |   |                       | N | No inception cohort                             |  |  |  |
| <b>Rubio-Rivas</b>    | 2020 |                     |   | N | Retrospective study   |   |                                                 |  |  |  |
| <b>Sachdeva</b>       | 2020 |                     |   |   |                       | N | No inception cohort                             |  |  |  |
| <b>Salvador</b>       | 2021 |                     |   |   |                       | N | No inception cohort                             |  |  |  |
| <b>Sami</b>           | 2020 |                     |   |   |                       | N | No inception cohort                             |  |  |  |
| <b>Santus</b>         | 2020 |                     |   |   |                       | N | No inception cohort                             |  |  |  |
| <b>Sarfaraz</b>       | 2021 |                     |   |   |                       | N | Included asymptomatic people                    |  |  |  |
| <b>Savasi</b>         | 2020 |                     |   |   |                       | N | Included asymptomatics people                   |  |  |  |
| <b>Seiglie</b>        | 2020 |                     |   |   |                       | N | No inception cohort                             |  |  |  |
| <b>Serling-Boyd</b>   | 2020 |                     |   |   |                       | N | Included no hospitalized people                 |  |  |  |
| <b>Sharma</b>         | 2021 |                     |   |   |                       | N | Included people <18 y                           |  |  |  |
| <b>Shwerzmann</b>     | 2021 |                     |   |   |                       | N | Included diagnosis for CT and clinical symptoms |  |  |  |
| <b>Skorin</b>         | 2020 |                     |   |   |                       | N | No inception cohort                             |  |  |  |
| <b>Smati</b>          | 2020 |                     |   | N | Retrospective study   |   |                                                 |  |  |  |
| <b>Snipelilisk</b>    | 2020 |                     | N |   |                       |   |                                                 |  |  |  |
| <b>Stockenhuber</b>   | 2020 |                     |   |   |                       | N | No inception cohort                             |  |  |  |
| <b>Sy</b>             | 2020 |                     |   |   |                       | N | Included no hospitalized people                 |  |  |  |
| <b>Tadolini</b>       | 2020 |                     |   |   |                       | N | No inception cohort                             |  |  |  |
| <b>Taramasso</b>      | 2020 |                     |   | N | Retrospective study   |   |                                                 |  |  |  |
| <b>Tatum</b>          | 2020 |                     |   |   |                       | N | No inception cohort                             |  |  |  |
| <b>Tehrani</b>        | 2020 |                     |   | N | Retrospective study   |   |                                                 |  |  |  |



|                  |      |        |  |   |                     |   |                                      |  |  |  |
|------------------|------|--------|--|---|---------------------|---|--------------------------------------|--|--|--|
| <b>Tomasoni</b>  | 2020 |        |  | N | Retrospective study |   |                                      |  |  |  |
| <b>Trabulus</b>  | 2020 |        |  |   |                     | N | No inception cohort                  |  |  |  |
| <b>Vaid</b>      | 2020 |        |  | N | Retrospective study |   |                                      |  |  |  |
| <b>Vizcarra</b>  | 2020 |        |  |   |                     | N | Included suspected cases of COVID-19 |  |  |  |
| <b>Vlachos</b>   | 2021 |        |  |   |                     | N | Data on symptom onset were missing   |  |  |  |
| <b>Vrsalovic</b> | 2020 | Letter |  |   |                     |   |                                      |  |  |  |
| <b>Vuagnat</b>   | 2020 |        |  |   |                     | N | Included non hospitalized people     |  |  |  |
| <b>Wang</b>      | 2020 |        |  |   |                     | N | No inception                         |  |  |  |
| <b>Wang</b>      | 2020 |        |  | N | Retrospective study |   |                                      |  |  |  |
| <b>Wang</b>      | 2021 |        |  |   |                     | N | Included people <18 y                |  |  |  |
| <b>Webb</b>      | 2020 |        |  |   |                     | N | Included non hospitalized people     |  |  |  |
| <b>Wendel</b>    | 2020 |        |  |   |                     | N | Included people <18 y                |  |  |  |
| <b>Yang</b>      | 2020 |        |  |   |                     | N | No inception cohort                  |  |  |  |
| <b>Yehia</b>     | 2020 |        |  | N | Retrospective study |   |                                      |  |  |  |
| <b>Zeng</b>      | 2020 |        |  | N | Retrospective study |   |                                      |  |  |  |
| <b>Zhang</b>     | 2020 |        |  |   |                     | N | Diagnosis not described              |  |  |  |
| <b>Zhang</b>     | 2020 |        |  | N | Retrospective study |   |                                      |  |  |  |
| <b>Zhang</b>     | 2021 |        |  | N | Retrospective study |   |                                      |  |  |  |
| <b>Zhao</b>      | 2020 |        |  | N | Retrospective study |   |                                      |  |  |  |
| <b>Zinellu</b>   | 2020 |        |  | N | Retrospective study |   |                                      |  |  |  |
| <b>Zorzi</b>     | 2020 |        |  | N | Retrospective study |   |                                      |  |  |  |
| <b>Zuccon</b>    | 2020 |        |  | N | Retrospective study |   |                                      |  |  |  |

Abbreviations: N=Not; CT=computed tomography.

**Table S3. Table of characterization**

| Study                                     | Country           | Sample size | Age<br>Mean (SD) or<br>Median (IQR) | Sex<br>No (%)                                   | Hospital setting         | Comorbidities<br>No (%)                                                                                                                                                                                                                                                                                               | Onset of<br>symptoms<br>Days median<br>(IQR) | Outcomes<br>No (%)<br>Days median (IQR)                                                                                       |
|-------------------------------------------|-------------------|-------------|-------------------------------------|-------------------------------------------------|--------------------------|-----------------------------------------------------------------------------------------------------------------------------------------------------------------------------------------------------------------------------------------------------------------------------------------------------------------------|----------------------------------------------|-------------------------------------------------------------------------------------------------------------------------------|
| Allenbach et al., (2020) <sup>20</sup>    | France            | 152         | 77 (60–83)                          | Male 91 (59.9)<br>Female 61 (40.13)             | Hospital<br>(17 to ICU)  | Smoker 10 (6.6), HBP 82 (53.9), DM 37 (24.3), DLP 50 (32.9), IHD 35 (23), Cancer 30 (19.7), COPD 12/151 (7.9)                                                                                                                                                                                                         | 5 (2-8)                                      | <b>Mortality:</b> 32 (21.9), 14 days<br><b>Recovery:</b> 84 (57.5)                                                            |
| Barrasa et al. (2020) <sup>34</sup>       | Spain             | 48          | 63 (51–75)                          | Male 27 (56)<br>Female 21 (44)                  | ICU                      | Obesity 23 (48), HBP 21 (44), DM 9 (19), Smoker 9 (19), HT 9 (19), HD 5 (10), Immunosuppression 3 (6), COPD 18 (38), solid organ transplant 1 (2)                                                                                                                                                                     | 7 (5–12)                                     | <b>Mortality:</b> 6 (13) 7 days, 14 (31), 15 days                                                                             |
| Brandão et al. (2021) <sup>14</sup>       | Brazil            | 506         | 59.2 (±16.8)                        | Male 290 (57.3)<br>Female 216 (42.7)            | Hospital<br>(300 to ICU) | HBP 280 (55.3%); diabetes 181 (35.8); smoking history 144 (39.2%); renal replacement therapy 15 (3.0%); Congestive heart failure 39 (7.7%); COPD 15 (3.0%); asthma 22 (4.4%); Other lung diseases 12 (2.4%); cancer 39 (7.7%); solid organ transplant 16 (3.2%); systemic lupus erythematosus 5 (1.0%); HIV 7 (1.4%). | <10                                          | <b>Mortality:</b> 153 (30.2), 21 days<br><b>Recovery:</b> 333 (65.9)                                                          |
| Cao et al. (2020) <sup>15</sup>           | China             | 102         | 54 (37–67)                          | Male 53 (52)<br>Female 49 (48)                  | Hospital<br>(18 to ICU)  | DM 11 (10.8), HBP 28 (27.5), CVD 5 (4.9) CRD 10 (9.8), cerebrovascular disease 6 (5.9), malignancy 4 (3.9), CKD 4 (3.9), CLD 2 (2.0)                                                                                                                                                                                  | 6 (3–7)                                      | <b>Mortality:</b> 17 (16.6), 15 (9–21) days<br><b>Morbidity:</b> Shock 10 (9.8), ARDS 20 (19.6)<br><b>Recovery:</b> 85 (83.3) |
| Cortes-Telles et al. (2020) <sup>22</sup> | México            | 200         | 55 (41–65)                          | Male 138 (69)<br>Female 62 (31)                 | Hospital<br>(44 to ICU)  | Obesity (52), HBP (30), DM (28)                                                                                                                                                                                                                                                                                       | 8 (6–9)                                      | <b>Mortality:</b> 77 (38), 8 (4–16)                                                                                           |
| Cummings et al. (2020) <sup>43</sup>      | United States     | 257         | 62 (51–72)                          | Male 171 (67)<br>Female 86 (33)                 | ICU                      | DM 92 (36) HBP 162 (63), CHD 49 (19), COPD or ILD 24 (9), asthma 21 (8), smoking history 33 (13), chronic neurological disease or dementia 24 (9), cancer (7), CKD 37 (14), LC 5 (2), solid organ transplant recipient 10 (4), HIV 8 (3)                                                                              | 5 (2-7)                                      | <b>Mortality:</b> 101 (39), 9 (5–15) days<br><b>Recovery:</b> 58 (23)                                                         |
| Dzupová et al. (2021) <sup>28</sup>       | Zech Republic     | 74          | 67.5 (56-75)                        | Male 46 (62.2)<br>Female 28 (37.8)              | ICU                      | CRD 17 (23.0); COPD only 7 (9.5); immunodeficiency 6 (8.1); diabetes 30 (40.5); HBP 48 (64.9); CAD 16 (21.6); CKD 10 (13.5); CLD 5 (6.8); Cancer 7 (9.5); Obesity 61 (82.5)                                                                                                                                           | 6 (4–8)                                      | <b>Mortality:</b> 30 (40.5)<br><b>Morbidity:</b> ARDS 57 (77.0)<br><b>Recovery:</b> 31 (41.9)                                 |
| Estella et al. (2021) <sup>33</sup>       | Spain             | 422         | 63 (54-71)                          | Male 305 (72.3)<br>Female 117 (27.7)            | ICU                      | COPD 25 (5.9), CKD 44 (10.4), cirrhosis 11 (2.6), cancer 30 (7.1)                                                                                                                                                                                                                                                     | 7 (4-9)                                      | <b>Mortality:</b> 152 (36.5), 42 days                                                                                         |
| Ferrando et al. (2020) <sup>38</sup>      | Spain and Andorra | 663         | 64 (56-72)<br>No=661                | Male 441 (66.7)<br>Female 219 (33.18)<br>No=660 | ICU                      | HBP 329 (49.6), DM 151 (22.7), CHD 9 (1.3), CKD 38 (5.7), asthma 17 (2.5), COPD 28 (4.2), DLP 90 (13.5), cancer 23 (3.4)                                                                                                                                                                                              | 7 (5-9)                                      | <b>Mortality:</b> 203 (30.6), 80 days<br><b>Morbidity:</b> SDRA 601 (90.6), Shock 150 (22.6)                                  |

|                                            |               |      |                |                                       |                                                                         |                                                                                                                                                                                                                                              |                        |                                                                                                                                                       |
|--------------------------------------------|---------------|------|----------------|---------------------------------------|-------------------------------------------------------------------------|----------------------------------------------------------------------------------------------------------------------------------------------------------------------------------------------------------------------------------------------|------------------------|-------------------------------------------------------------------------------------------------------------------------------------------------------|
| Giacomelli et al. (2020) <sup>21</sup>     | Italy         | 233  | 61 (50–72)     | Male 161 (69.1)<br>Female 72 (30.9)   | Hospital and ICU<br>(145 – mild and moderate, 88 – severe and critical) | Smoking history 70 (30), obesity 38 (16.3)                                                                                                                                                                                                   | 7 (4–9)                | <b>Mortality:</b> 48 (20.6), 11 (6–18) days<br><b>Recovery:</b> 162 (69.5)                                                                            |
| Gupta et al. (2020) <sup>41</sup>          | United States | 2215 | 60.5 (14.5)    | Male 1436 (64.8)<br>Female 779 (35.2) | ICU                                                                     | DM 861 (38.9), HBP 1322 (59.7), CAD 288 (13.0), CHF 196 (8.8), CLD 531 (24.0), COPD 173 (7.8), asthma 258 (11.6), smoking history 656 (29.6), CKD 280 (12.6), end-stage KD 64 (2.9), malignancy 112 (5.1), immunodeficiency 65 (2.9)         | 7 (4-10)               | <b>Mortality:</b> 875 (39.5); 16 (8-28)<br><b>Morbidity:</b> Respiratory failure 727 (92.7), Septic shock 311 (39.7)<br><b>Recovery:</b> 1.203 (54.3) |
| Jourdes et al. (2020) <sup>18</sup>        | France        | 263  | 65 (54–76)     | Male 155 (58.9)<br>Female 108 (41.06) | Hospital<br>(111 to ICU)                                                | Overweight 88/244 (36.1), obesity 69/244 (28.3) HBP 104 (39.5), DM 52 (19.8), HD 35 (13.3) cerebrovascular disease 17 (6.5), CRD 57 (21.6), CKD 24 (9.1), CLD 2 (0.8), malignancy 27 (10.3), immunosuppression 24 (9.1) smokers 11/115 (9.3) | 7 (4–10)               | <b>Mortality:</b> 19, 14 days<br><b>Recovery:</b> 173, 14 days                                                                                        |
| Kaeuffer et al. (2020) <sup>19</sup>       | France        | 1045 | 66 (20–100)    | Male 612 (59)<br>Female 433 (41.4)    | Hospital<br>(335 to ICU)                                                | HBP 548 (52.4), DM 264 (25.3), smoker 36 (3.4), CHF 121 (11.6), CRD 172 (16.5), CKD 117 (11.2), CLD 11 (1.1), immunosuppression 48 4.6, cancer 109 (10.4), pregnancy 15 (1.4)                                                                | 7.2 (5.3)              | <b>Mortality:</b> 115 (11), 7 days, 195 (18.7), 30 days<br><b>Morbidity:</b> 335 (32.1)<br><b>Recovery:</b> 155 (14.8)                                |
| Kayina et al. (2020) <sup>30</sup>         | India         | 235  | 50.7±15.1      | Male 160 (68.1)<br>Female 75 (31.91)  | ICU                                                                     | HBP 65, DM 54, CAD 13, CKD 22, CLD 10, COPD 5, cancer 26                                                                                                                                                                                     | 4 (2-5)                | <b>Mortality:</b> 20, 1 day                                                                                                                           |
| Larsson et al. (2020) <sup>39</sup>        | Sweden        | 260  | 59 (51-65)     | Male 208 (80.0)<br>Female 52 (20)     | ICU                                                                     | HBP 103 (39.6), CHD 17 (6.5), COPD/asthma 33 (12.7), immunodeficiency 15 (5.8), CLD 1 (0.4), CKD 4 (1.5), DM 68 (26.2), neuromuscular disease 3 (1.2)                                                                                        | 11 (8-14)              | <b>Mortality:</b> 60, 12 days (6-18)<br><b>Recovery:</b> 62 (23.9)                                                                                    |
| Madsen et al. (2021) <sup>17</sup>         | Denmark       | 83   | 62 (54-74)     | Male 52 (62.7)<br>Female 31 (37.3)    | Hospital<br>(13 transfer for ICU)                                       | CVD 46 (55.4), HBP 35 (42.2), stroke 4 (4.8), CRD 14 (16.9), malignancy 14 (16.9), DM 13 (15.7), inflammatory bowel disease 3 (3.6), rheumatoid arthritis 3 (3.6), CKD 2 (2.4)                                                               | 9 (5.5-11)             | <b>Mortality:</b> 4, 10 days (6.5-13)<br><b>Morbidity:</b> ARDS, 28 (33.7)<br><b>Recovery:</b> 78 (94)                                                |
| Molnar et al. (2020) <sup>42</sup>         | United States | 386  | 60 (51-70)     | Male 277 (72)<br>Female 109 (28)      | ICU                                                                     | DM 253 (66), HBP 317 (82), CAD 104 (27), CHF 71 (18), atrial fibrillation or atrial flutter 48 (12), COPD 21 (5), asthma 23 (6), smoking history 117, CKD 198 (51), CLD 35 (9), HIV 10 (3), cancer 25 (6)                                    | 5 (3-8)                | <b>Mortality:</b> 163, 28 days<br><b>Morbidity:</b> ARDS, 52, Septic shock, 26                                                                        |
| Myrstad et al. (2020) <sup>24</sup>        | Norway        | 66   | 71.5 (30–95)   | Male 38 (58)<br>Female 28 (42)        | Hospital<br>(7 transfer to ICU)                                         | HBP 4 (27), DM 3 (20), CKD 2 (13), Malignancy 3 (20), COPD 4 (27)                                                                                                                                                                            | 6.9 (3.8)<br>8.7 (5.0) | <b>Mortality:</b> 13 (20), 5 days<br><b>Recovery:</b> 53 (80)                                                                                         |
| Namendys-Silva et al. (2021) <sup>32</sup> | Mexico        | 164  | 57.3 (SD 13.7) | Male 114 (69.5)<br>Female 50 (30.48)  | ICU                                                                     | HBP 63 (38.4), DM 53 (32.3), smoker 24 (14.3), solid tumors 10 (6.0), COPD 4 (2.4), CKD 6 (3.6)                                                                                                                                              | 7 (4.5-9)              | <b>Mortality:</b> 85 (51.8), 30 days                                                                                                                  |

|                                                |                                  |           |                                                |                                                   |                                    |                                                                                                                                                                                                                    |                             |                                                                                                      |
|------------------------------------------------|----------------------------------|-----------|------------------------------------------------|---------------------------------------------------|------------------------------------|--------------------------------------------------------------------------------------------------------------------------------------------------------------------------------------------------------------------|-----------------------------|------------------------------------------------------------------------------------------------------|
| Olivas-Martínez et al. (2021) <sup>23</sup>    | Mexico                           | 800       | 51.9 (13.9)                                    | Male 488 (61)<br>Female 312 (39)                  | Hospital<br>(199 transfer to ICU)  | Diabetes 209 (26), obesity 357/797 (44.8), HBP 240 (30), CRD 7 (0.9), asthma 11 (1.4), immunosuppression 48 (6), HIV 10 (1.2), CVD 37 (4.6), CKD 24 (3), CLD 6 (0.8), Smoking 112 (14)                             | 8 (6-10)                    | <b>Mortality:</b> 241<br><b>Morbidity:</b> ARDS 159 (67), MOFS 67                                    |
| Rodríguez et al. (2020) <sup>35</sup>          | Spain                            | 43        | 65.5 (52-72)                                   | Male 27 (62.8)<br>Female 16 (37.2)                | ICU                                | DM 18 (18.6), HBP 13 (30.2), CHD 2 (4.7) IHD 4 (9.3), COPD 4 (9.3), CKD 2 (4.7), obesity 11 (25.6), autoimmune disease 3 (7)                                                                                       | 8 (6-10)                    | <b>Mortality:</b> 10 (23.5), 28 days<br><b>Morbidity:</b> ARDS 40 (93)<br><b>Recovery:</b> 28 (60.5) |
| Pineiro et al. (2021) <sup>36</sup>            | Spain                            | 52        | 71.5 (61–74.7)                                 | Male 40 (77)<br>Female 12 (23)                    | ICU                                | None 14 (26.9), HBP 31 (59.6), DM 11 (21.2), CHF 2 (3.8), IHD 3 (5.8), obesity 9 (17.3), COPD 11 (21.2), smoker 3 (5.8), cancer 3 (5.8), HIV 1 (1.9), CKD 7 (13.5)                                                 | 10 (4)                      | <b>Mortality:</b> 27 (51.92), 35.5 (IQR 36.75)<br><b>Recovery:</b> 25 (48)                           |
| Piowarczyk et al. (2020) <sup>25</sup>         | Poland                           | 60        | ARF group 59 (50–67), Non-ARF group 39 (25–51) | Male 31(51,66)<br>Female 29 (48,33)               | Hospital<br>(10 in MV)             | HBP 20, COPD 1, diabetes 4, CVD 8, LD 2, CKD 0                                                                                                                                                                     | 7 (4–8)                     | <b>Mortality:</b> 8<br><b>Morbidity:</b> ARDS 22 (36.6)                                              |
| Radovanovic et al. (2021) <sup>31</sup>        | Italy                            | 2nd p= 76 | 2 <sup>nd</sup> p= 68 (55–77)                  | 2 <sup>nd</sup> p= Male 56 (74)<br>Female 20 (26) | ICU                                | 2 <sup>nd</sup> p= HBP 33 (43.4), diabetes 23 (30.3), IHD 17 (22.4), CHF 5 (6.6), arrhythmia 7 (9.2), COPD 8 (10.5), asthma 8 (10.5), obesity 9 (11.8), psychiatric disorders 4 (5.3), cancer 7 (9.2), CKD 6 (7.9) | 2 <sup>nd</sup> p= 5 (6–13) | <b>Mortality:</b> 2 <sup>nd</sup> p= 17 (22.4)<br><b>Recovery:</b> 42 (55.4)                         |
| Roberts et al. (2020) <sup>27</sup>            | United States                    | 40        | 61 (52-66)                                     | Male 28 (70)<br>Female 12 (30)                    | Hospital<br>(11 ICU)               | HBP 33 (83), DM 15 (38), CKD 30 (75), CRD 8 (20), asthma 3 (8), HIV 1 (3), HF 9 (23), HLP 14 (35), cancer 1 (3), smoking history 19 (48)                                                                           | 7 (10)                      | <b>Mortality:</b> 5 (16), 10-28 days<br><b>Recovery:</b> 23 (72)                                     |
| Rodriguez-Molinero et al. (2020) <sup>26</sup> | Spain                            | 418       | 65.4 (SD 16.6)                                 | Male 238 (56,9)<br>Female 180 (43,1)              | Hospital<br>(254 – severe disease) | CKD 61, HBP 217, DM 99, DLP 145, obesity 74, smoking 36, alcoholism 11, HF 26, IHD 37, atrial fibrillation 45, stroke 2, asthma 23, COPD 41, dementia 43, cancer 48, HIV 3, organ transplant 1                     | 8.0 (SD 4.5)                | <b>Mortality:</b> 79, 30 days                                                                        |
| Schmidh et al. (2020) <sup>29</sup>            | France, Switzerland, and Belgium | 4244      | 63 (54–71)                                     | Male 3159 (74.4)<br>Female 1085 (26)              | ICU                                | HBP 2018 (48), DM 1167 (28), immunodeficiency 314 (7)                                                                                                                                                              | 9 (6–12)                    | <b>Mortality:</b> 1.298, 90 days<br><b>Morbidity:</b> ARDS 2233                                      |
| Taboada et al. (2020) <sup>37</sup>            | Spain                            | 97        | 69 (61-73)                                     | Male 62 (63.9)<br>Female 35 (36.08)               | ICU                                | HBP 55 (56.7), DLP 42 (43.3), DM 22 (22.7), asthma 7 (7.2), COPD 11 (11.3), HD 28 (28.9), cancer 7 (7.2), obesity 38 (39.2)                                                                                        | 10 (7-12)                   | <b>Mortality:</b> 15, 42 (34-45) days                                                                |
| Thomson et al. (2020) <sup>40</sup>            | England                          | 156       | 62 (54-70)                                     | Male 112 (72)<br>Female 44 (28)                   | ICU                                | HBP 81, DLP 56, DM 52, IHD 26, CKD 23, CRD 19, end-stage renal failure on dialysis 13                                                                                                                              | 7 (5-10)                    | <b>Mortality:</b> 38, 30 days<br><b>Recovery:</b> 82                                                 |
| Yang et al. (2021) <sup>16</sup>               | China                            | 357       | 56.0 (43.0, 68.0)                              | Male 185 (51.8)<br>Female 172 (48,1)              | Hospital                           | Coexisting disorders 154 (43.1), (including HBP, DM, CRD, CVD or cerebrovascular disease, CKD, HIV metastatic malignancy, CLD)                                                                                     | 9.0 (5.0, 15.0)             | <b>Mortality:</b> 25, 28 days                                                                        |

**Abbreviations:** ICU=intensive care unit; ARF=acute respiratory failure; ARDS=acute respiratory distress syndrome; 2<sup>nd</sup> p= second period; HBP=high blood pressure; DM=diabetes mellitus; DLP=dyslipidemia; IHD=ischemic heart disease; COPD=chronic obstructive pulmonary disease; HT=hypothyroidism; HD=heart disease; CVD=cardiovascular disease; CHF=chronic heart failure; CRD=chronic respiratory diseases; CKD=chronic kidney disease; CLD=chronic liver disease; ILD=interstitial lung disease; LC=liver cirrhosis; HIV=human immunodeficiency virus; CAD=coronary artery disease; KD=kidney disease; HLP=hyperlipidemia; SD=standard deviation; IQR=interquartile range.

**Table S4. Distribution of patients for setting and outcomes prevalence.**

| <b>Setting</b> | <b>Transfer to</b> |         | <b>Mortality</b> | <b>Morbidity</b> |              | <b>Recovery</b> |
|----------------|--------------------|---------|------------------|------------------|--------------|-----------------|
|                | No                 | ICU/ MV | No               | MOFS<br>No       | ARDS<br>No   | No              |
| Hospital ward  | 4325               | 1407    | 916              | 412/2,869        | 229/ 1,045   | 991/ 1,445      |
| ICU            | 9392               | -       | 3,457            | 487/3,264        | 3,710/ 7,625 | 1,531/3,133     |
| Total          | 13,717             | 1407    | 4,373            | 899/6,133        | 3,939/ 8,670 | 2,522/ 4,578    |

Abbreviations: ICU=intensive care unit; MV=mechanical ventilation; MOFS=multiorgan failure syndrome; ARDS=acute respiratory distress syndrome.

**Figure S1. Prevalence of hypertension in the sample.**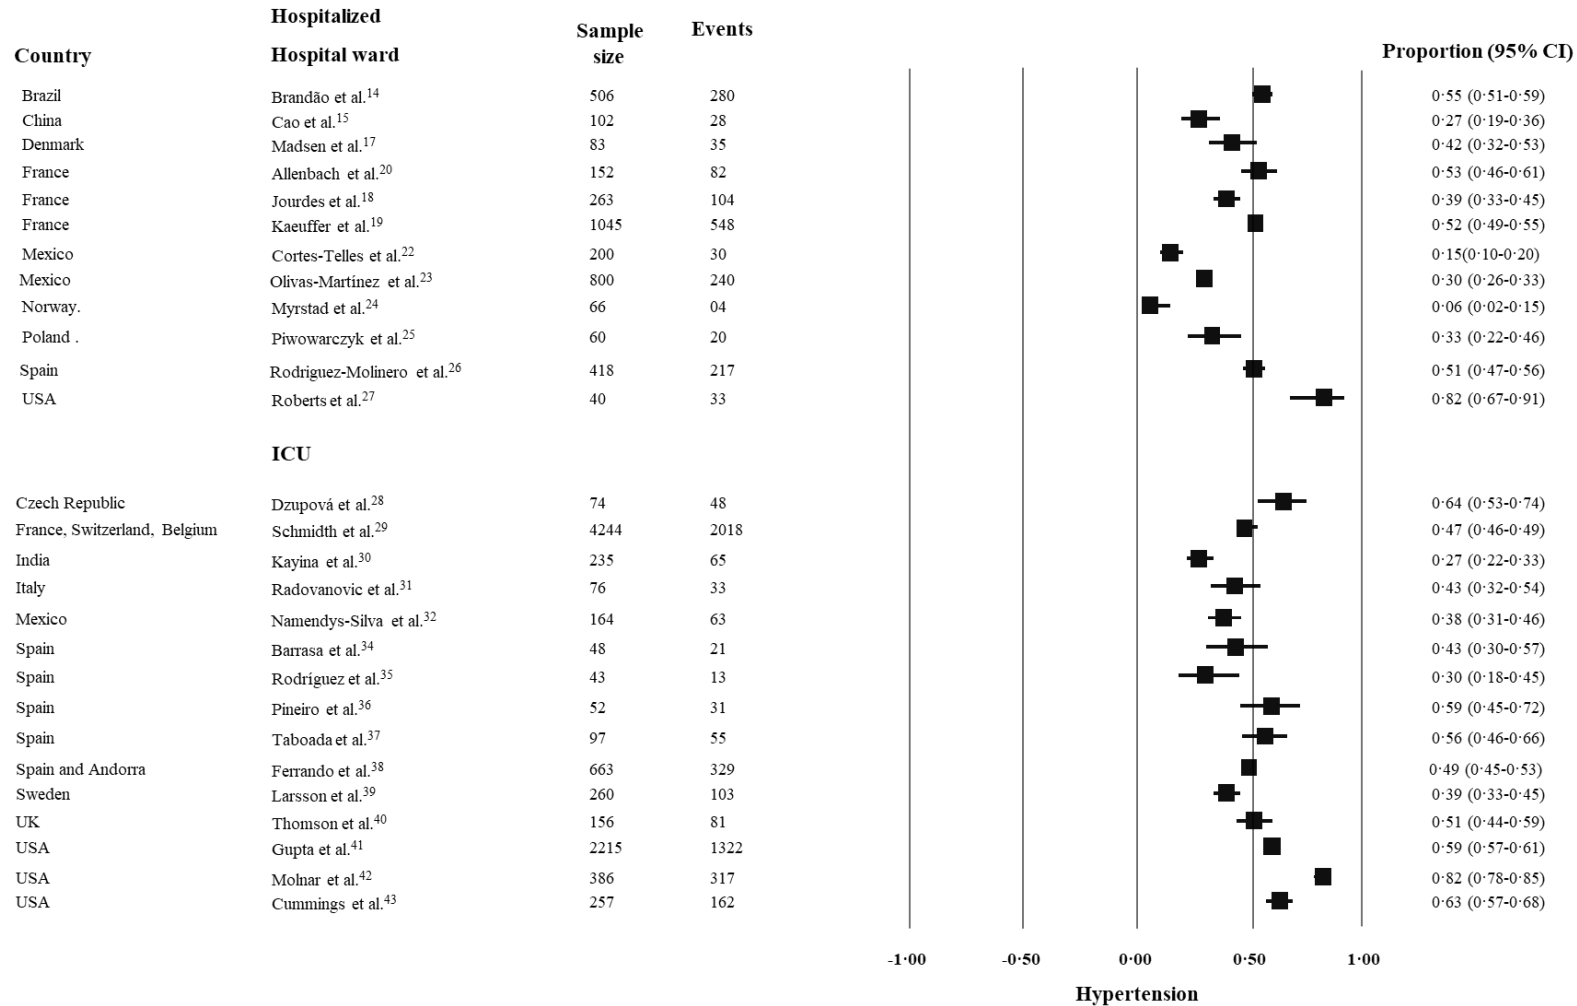

For analysis, the studies were grouped by country and by hospital setting (hospital ward or ICU). Estimates of proportions for dichotomous data, considering number of events and sample size, were reported. Abbreviations: ICU=intensive care unit; CI=confidence interval; USA=United States of America; UK=United Kingdom.

**Figure S2. Prevalence of diabetes in the sample.**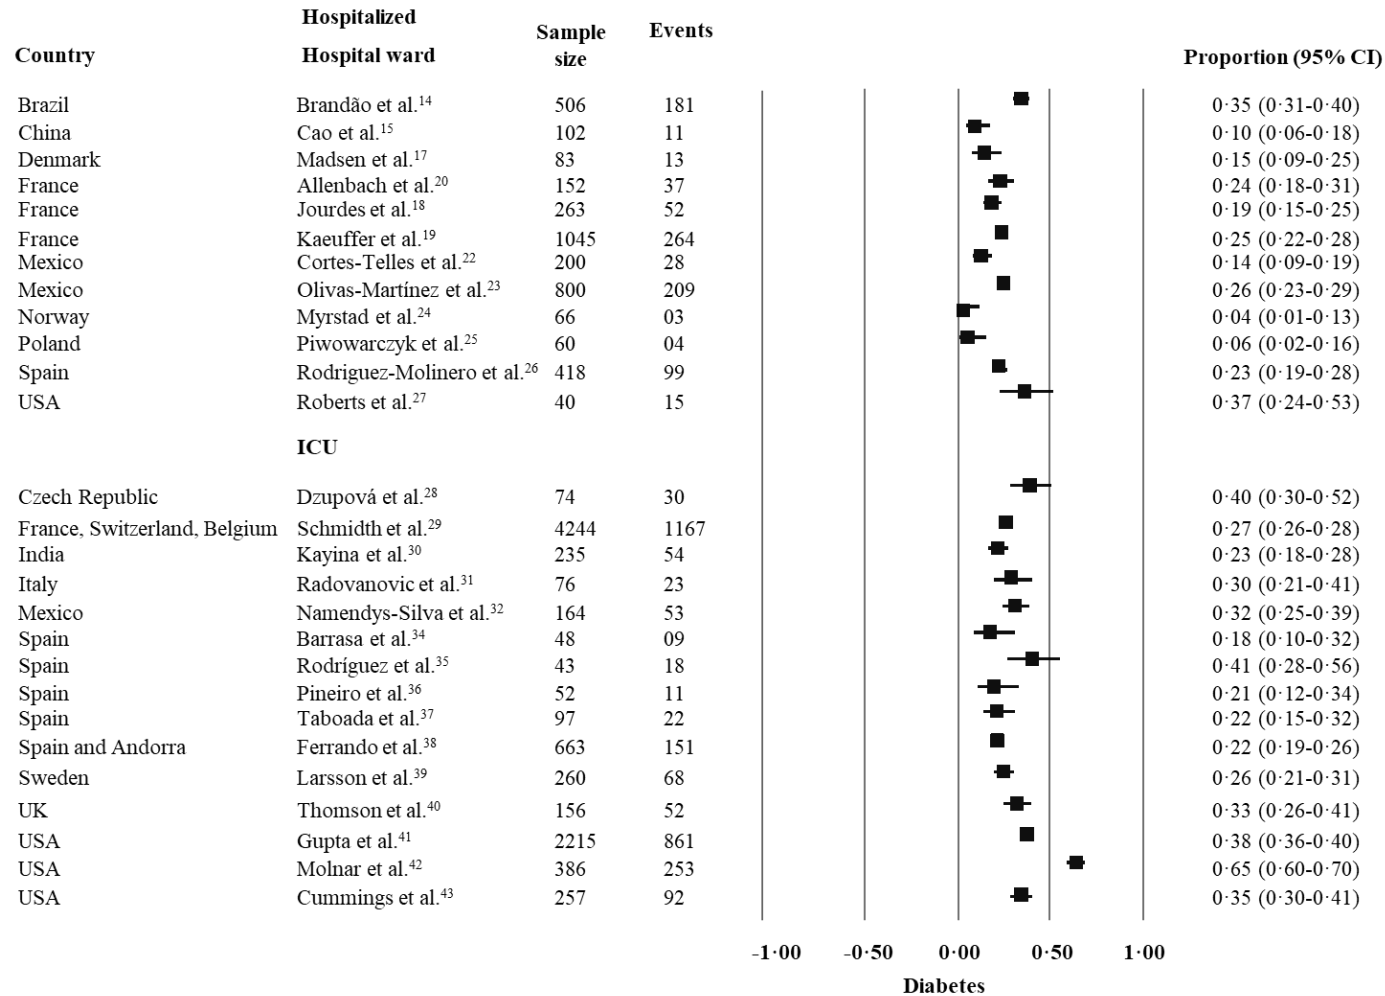

For analysis, the studies were grouped by country and by hospital setting (hospital ward or ICU). Estimates of proportions for dichotomous data, considering number of events and sample size, were reported. Abbreviations: ICU=intensive care unit; CI=confidence interval; USA=United States of America; UK=United Kingdom.

**Figure S3. Prevalence of obesity in the sample.**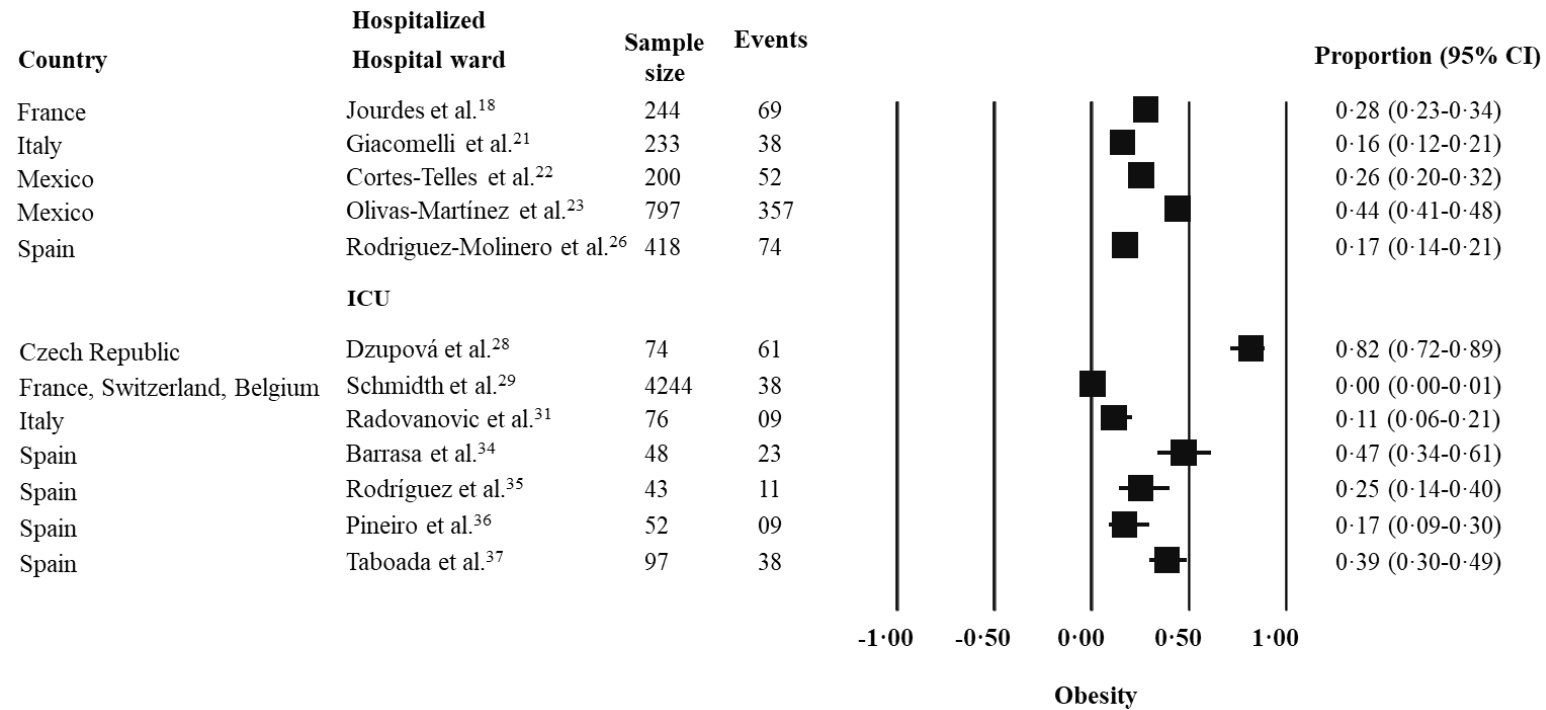

For analysis, the studies were grouped by country and by hospital setting (hospital ward or ICU). Estimates of proportions for dichotomous data, considering number of events and sample size, were reported. Abbreviations: ICU=intensive care unit; CI=confidence interval.



**Figure S4. Prevalence of smoking history in the sample.**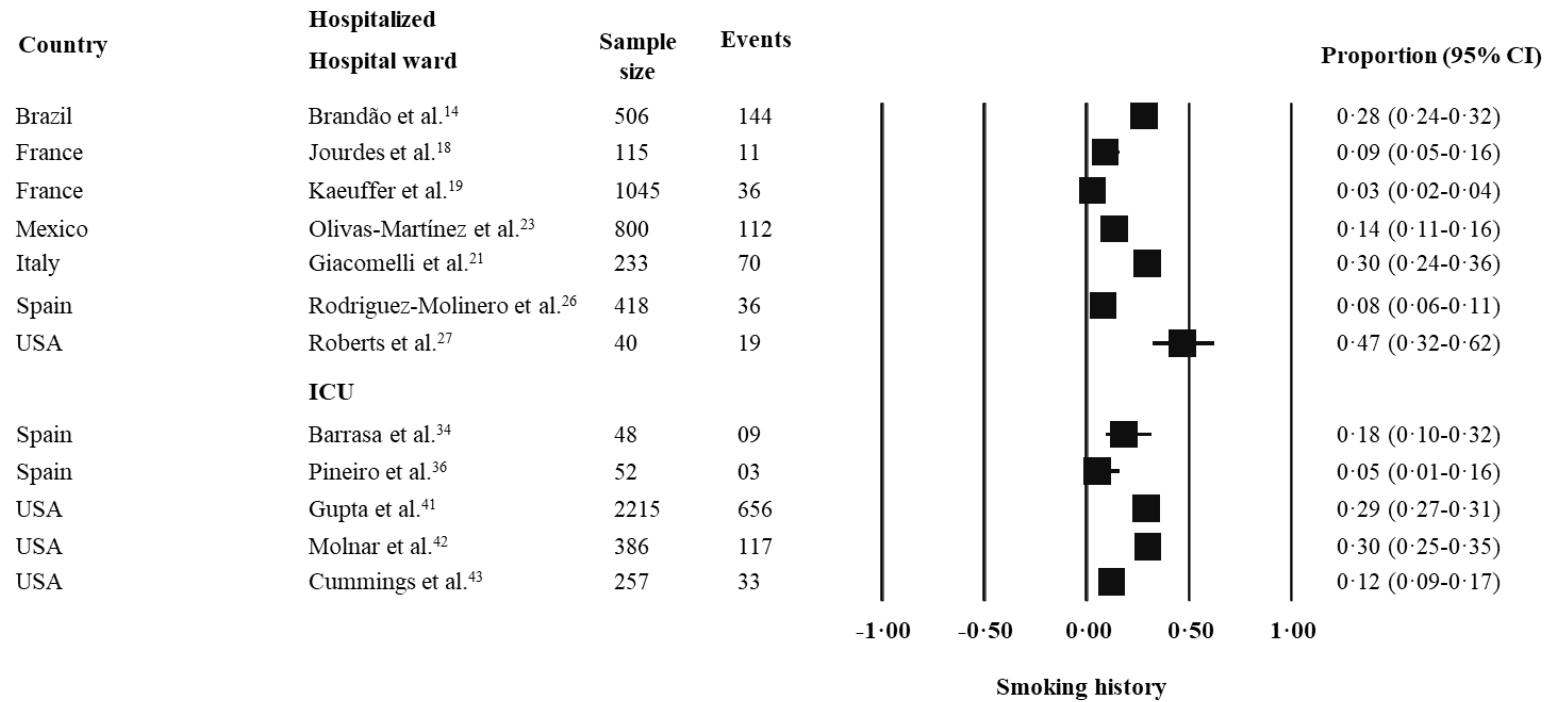

For analysis, the studies were grouped by country and by hospital setting (hospital ward or ICU). Estimates of proportions for dichotomous data, considering number of events and sample size, were reported. Abbreviations: ICU=intensive care unit; CI=confidence interval; USA=United States of America.

**Table S5. Risk of bias assessment (QUIPS)**

| Study                                   | Study Participation | Study Attrition | Prognostic Factor Measurement | Outcome Measurement | Study Confounding | Statistical Analysis and Reporting |
|-----------------------------------------|---------------------|-----------------|-------------------------------|---------------------|-------------------|------------------------------------|
| Allenbach et al. <sup>20</sup>          | Moderate            | Low             | N/A                           | Low                 | Moderate          | Low                                |
| Barrasa et al. <sup>34</sup>            | Moderate            | Low             | N/A                           | Low                 | High              | Moderate                           |
| Brandão et al. <sup>14</sup>            | Moderate            | Low             | N/A                           | Low                 | Moderate          | Low                                |
| Cao et al. <sup>15</sup>                | Moderate            | Low             | N/A                           | Moderate            | High              | Moderate                           |
| Cortes-Telles et al. <sup>22</sup>      | Moderate            | Low             | N/A                           | Moderate            | Moderate          | Low                                |
| Cummings et al. <sup>43</sup>           | Moderate            | Moderate        | N/A                           | Low                 | Moderate          | Low                                |
| Dzupová et al. <sup>28</sup>            | Low                 | Low             | N/A                           | Moderate            | High              | Moderate                           |
| Estella et al. <sup>33</sup>            | Low                 | Moderate        | N/A                           | Low                 | Moderate          | Low                                |
| Ferrando et al. <sup>38</sup>           | Low                 | Moderate        | N/A                           | Moderate            | High              | Low                                |
| Giacomelli et al. <sup>21</sup>         | Moderate            | Low             | N/A                           | Low                 | Moderate          | Low                                |
| Gupta et al. <sup>41</sup>              | Moderate            | Low             | N/A                           | Low                 | Moderate          | Low                                |
| Jourdes et al. <sup>18</sup>            | Moderate            | Low             | N/A                           | Low                 | High              | Moderate                           |
| Kaeuffer et al. <sup>19</sup>           | Moderate            | Low             | N/A                           | Low                 | Moderate          | Low                                |
| Kayina et al. <sup>30</sup>             | Moderate            | Moderate        | N/A                           | Low                 | High              | Moderate                           |
| Larsson et al. <sup>39</sup>            | Moderate            | Low             | N/A                           | Low                 | Moderate          | Low                                |
| Madsen et al. <sup>17</sup>             | Low                 | Low             | N/A                           | Low                 | High              | Moderate                           |
| Molnar et al. <sup>42</sup>             | Moderate            | Low             | N/A                           | Low                 | High              | Moderate                           |
| Myrstad et al. <sup>24</sup>            | Moderate            | Low             | N/A                           | Low                 | High              | Low                                |
| Namendys-Silva et al. <sup>32</sup>     | Moderate            | Moderate        | N/A                           | Low                 | Moderate          | Low                                |
| Olivas-Martinez et al. <sup>23</sup>    | Moderate            | Moderate        | N/A                           | Low                 | Moderate          | Low                                |
| Rodríguez et al. <sup>35</sup>          | Moderate            | Low             | N/A                           | Low                 | High              | Moderate                           |
| Pineiro et al. <sup>36</sup>            | Low                 | Low             | N/A                           | Low                 | Moderate          | Low                                |
| Piwowarczyk et al. <sup>25</sup>        | Low                 | Low             | N/A                           | Moderate            | High              | Low                                |
| Radovanovic et al. <sup>31</sup>        | Moderate            | Low             | N/A                           | Moderate            | High              | Low                                |
| Roberts et al. <sup>27</sup>            | Moderate            | Low             | N/A                           | Low                 | High              | Moderate                           |
| Rodriguez-Molinero et al. <sup>26</sup> | Moderate            | Low             | N/A                           | Low                 | Moderate          | Low                                |
| Schmidt et al. <sup>29</sup>            | Moderate            | High            | N/A                           | Low                 | Moderate          | Low                                |
| Taboada et al. <sup>37</sup>            | Moderate            | Low             | N/A                           | Low                 | High              | Moderate                           |
| Thomson et al. <sup>40</sup>            | Moderate            | Low             | N/A                           | Low                 | Moderate          | Low                                |
| Yang et al. <sup>16</sup>               | Moderate            | Low             | N/A                           | Low                 | High              | Low                                |

Low: low risk of bias, Moderate: moderate risk of bias, High: high risk of bias. N/A: not applicable. The risk of bias was determined by judging the warming items for each domain.
